# Supplementary material for: Surface energy balance fluxes in a suburban of Beijing: energy partitioning variability
Source: Copernicus journal article supplement (doi:10.5194/acp-2021-1022), 2022-01-31
Supplement: Supplementary file 1 [file acp-2021-1022-supplement.pdf]

# Surface energy balance fluxes in a suburban of Beijing: energy partitioning variability

## Supporting Information

Junxia Dou<sup>1</sup>, Sue Grimmond<sup>2</sup>, Shiguang Miao<sup>1</sup>, Bei Huang<sup>3</sup>, Huimin Lei<sup>3</sup>, Mingshui Liao<sup>4</sup>

<sup>1</sup>Institute of Urban Meteorology, China Meteorological Administration, Beijing 100089, China

<sup>2</sup>Department of Meteorology, University of Reading, Reading, RG6 6ET, UK

<sup>3</sup>Department of Hydraulic Engineering, Tsinghua University, Beijing 100084, China

5 <sup>4</sup>Miyun Meteorological station, Beijing Meteorological Bureau, Beijing 101599, China

Correspondence to: Junxia Dou (jxdou@ium.cn)

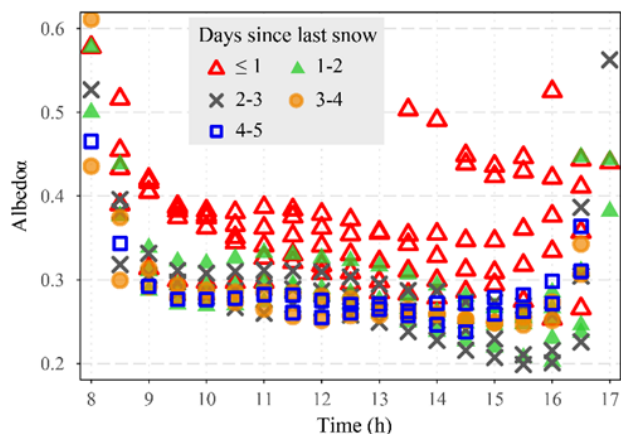

Figure S1: Albedo variation with time since last snowfall from December 2012 to February 2013.

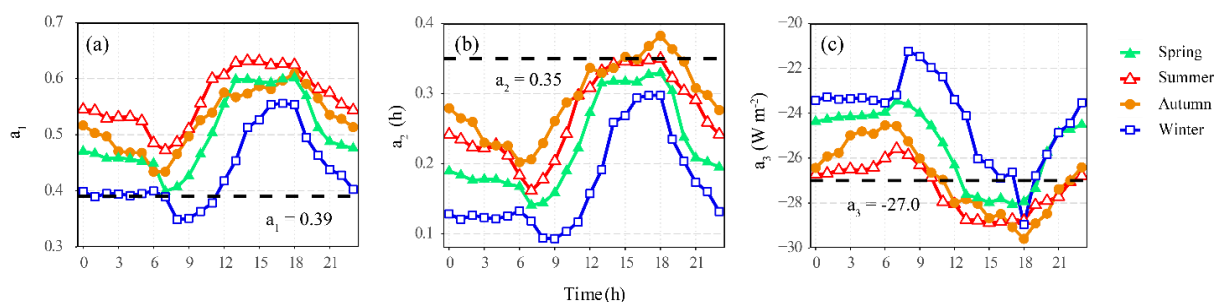

10 Figure S2: Seasonal diurnal variation of OHM coefficients (a)  $a_1$ , (b)  $a_2$  and (c)  $a_3$  for Miyun and for Swindon (dashed line).

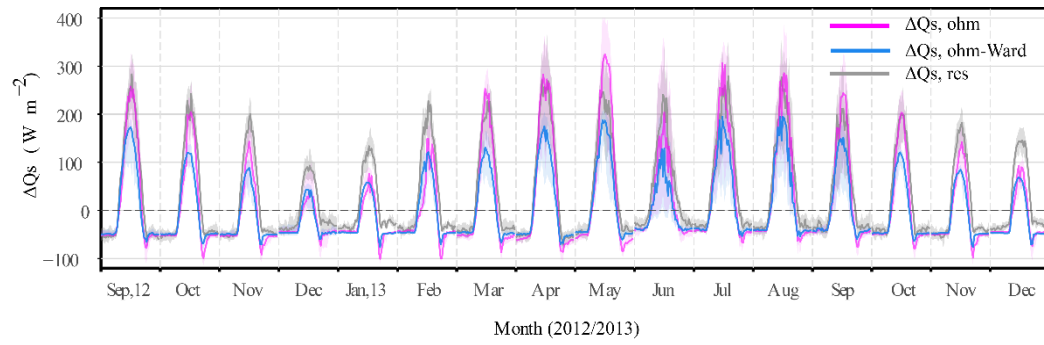

15 **Figure S3:** Monthly median and IQR (shading) diurnal patterns of storage heat flux ( $\Delta Q_{S,ohm}$ ,  $\Delta Q_{S,ohm-Ward}$  and  $\Delta Q_{S,res}$ ) at Miyun (September 2012 to December 2013) (section 3.2).  $\Delta Q_{S,ohm-Ward}$ : estimated  $\Delta Q_S$  at MY by using OHM coefficients of Ward et al (2013).

20

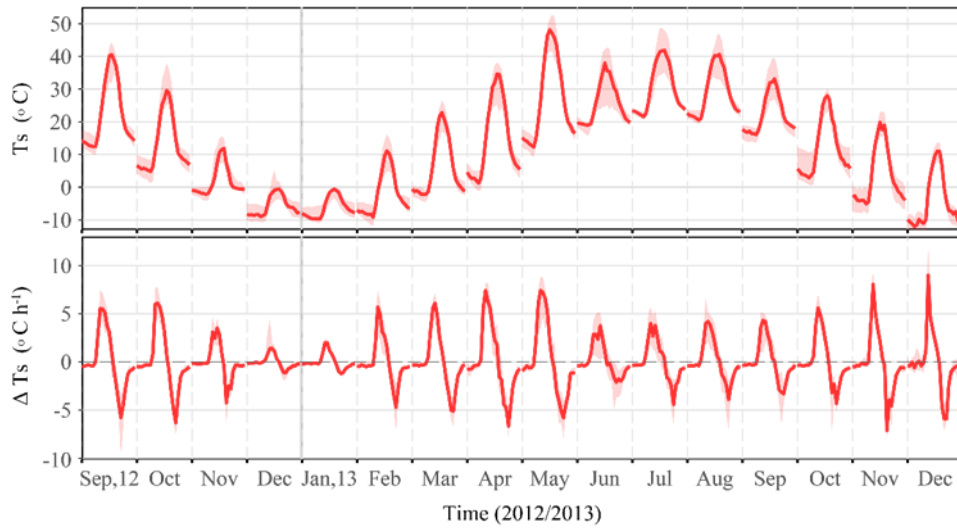

**Figure S4:** Observed monthly median and IQR (shading) diurnal patterns of (a) soil surface temperature (0 cm) and (b) hourly soil temperature difference ( $\Delta T_s = (T_{s_{i+1}} - T_{s_i}) / \Delta t$ , where  $i=0-23$  and  $\Delta t = 1 h$ ).

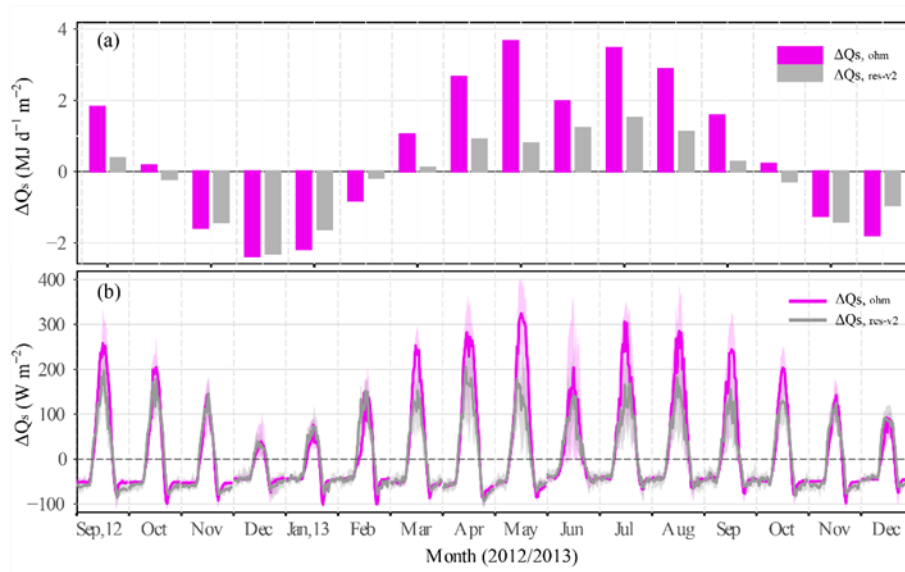

25 **Figure S5:** Monthly storage heat flux ( $\Delta Q_{s,ohm}$  and  $\Delta Q_{s,res-v2}$ ) at Miyun (September 2012 to December 2013) (section 3.2): (a) mean flux for 24 h, and (b) median diurnal patterns with inter-quartile range (IQR) (shading).
